# Supplementary material for: Cancer in the news: Bias and quality in media reporting of cancer research
Source: PLoS One. 2020 Nov 9;15(11):e0242133. doi: 10.1371/journal.pone.0242133 (PMC7652252; doi:10.1371/journal.pone.0242133)
Supplement: S1 Table — (XLSX) [file pone.0242133.s001.xlsx]

## Sheet: Data analysis
Headline	Media URL	Date (P,A)	News source	Section	Weekday	Basis of research source	Research source	Reseearch URL	PMID	Research country	Study type	Peer reviewed	ID funding/CoI	Independent expert	Link provided	Traceable source	Mentioned limitations	Context	AR/benefit quantified?	Misleading headline	Emphasis maintained	Overgeneralising	Total	snr authors	quoted experts	cancer type
Leukaemia breakthrough CAR-T uses children's own blood cells to attack cancer	http://www.abc.net.au/news/2017-08-31/leukaemia-breakthrough-uses-blood-cells-to-attack-cancer/8859162	31/8/17, 02/10/17	ABC Aus	News	Thu	U	Determine Efficacy and Safety of CTL019 in Pediatric Patients With Relapsed and Refractory B-cell ALL (ELIANA)	https://clinicaltrials.gov/ct2/show/NCT02435849	-	USA	CT2	0	0	0	0	1	1	1	0	0	2	3	8		M	blood
New cervical cancer vaccine may almost eliminate disease, research shows	http://www.abc.net.au/news/2017-08-10/new-vaccine-may-nearly-eliminate-cervical-cancer/8793316	10/8/17, 02/10/17	ABC Aus	News	Thu	PP	Looking beyond human papillomavirus (HPV) genotype 16 and 18: Defining HPV genotype distribution in cervical cancers in Australia prior to vaccination	http://onlinelibrary.wiley.com/wol1/doi/10.1002/ijc.30871/abstract	28677147	Aus	Epid	3	0	0	0	1	0	0	0	0	2	2	8	FF	F	Cervical
Devil facial tumour disease research opening doors to cancer growth mysteries	http://www.abc.net.au/news/2017-07-25/devil-tumour-research-shows-application-to-human-cancers/8738954	25/7/17, 02/10/17	ABC Aus	News	Tue	PP	Untangling the model muddle: Empirical tumour growth in Tasmanian devil facial tumour disease	https://www.ncbi.nlm.nih.gov/pmc/articles/PMC5524923/	28740255	Aus	BR	3	0	0	0	1	0	1	-	1	3	3	12	MF	MMF	Devil facial tumour
Mr Fluffy asbestos: Male residents at increased risk of contracting mesothelioma	http://www.abc.net.au/news/2017-06-21/mr-fluffy-mesothelioma-risk-canberra-anu-study/8638670	21/6/17, 02/10/17	ABC Aus	News	Wed	Report	ACT Asbestos Health Study: Data Linkage Study on the Risk of Mesothelioma and Other Cancers in Residents of Affected Properties in the ACT	http://nceph.anu.edu.au/files/ACTAHS_DataLinkageStudy_15June2017.pdf	-	Aus	Epid	0	0	1	1	1	1	0	1	1	2	3	11		MF	lung
BRCA1, BRCA2 study provides new clarity on breast cancer risk for carriers of gene mutations	http://www.abc.net.au/news/2017-06-21/study-provides-new-clarity-of-breast-cancer-risk-for-carriers/8636200	21/6/17, 02/10/17	ABC Aus	News	Wed	PP	Risks of Breast, Ovarian, and Contralateral Breast Cancer for BRCA1 and BRCA2 Mutation Carriers	http://jamanetwork.com/journals/jama/article-abstract/2632503	28632866	International	Epid	3	0	0	0	1	0	1	0	1	3	3	12	FM	M	Breast
Skin cancer: Squamous cell carcinoma trial offers some patients hope of avoiding chemotherapy	http://www.abc.net.au/news/2017-06-16/patients-type-advanced-skin-cancer-do-not-require-chemotherapy/8625448	16/6/17, 02/10/17	ABC Aus	News	Fri	C	Post-operative concurrent chemo-radiotherapy versus post-operative radiotherapy in high-risk cutaneous squamous cell carcinoma of the head and neck: A randomized phase III trial (Trans Tasman Radiation Oncology Group 05	http://ascopubs.org/doi/abs/10.1200/JCO.2017.35.15_suppl.6008	-	Aus	CT3	0	0	0	0	1	0	1	1	1	3	3	10		M	Skin
Smokers more likely to develop skin cancer, QIMR Berghofer research finds	http://www.abc.net.au/news/2017-05-17/smokers-more-likely-to-develop-common-skin-cancer-qimr-berghofer/8532940	17/5/17, 02/10/17	ABC Aus	News	Wed	PP	Cigarette Smoking and the Risks of Basal Cell Carcinoma and Squamous Cell Carcinoma	http://www.sciencedirect.com/science/article/pii/S0022202X17314124	28414022	Aus	Epid	3	0	0	0	1	0	0	0	1	2	2	9	MM	D	Skin
Breast cancer treatment trial cuts weeks of radiation to single nine-minute dose	http://www.abc.net.au/news/2017-05-08/weeks-of-radiation-cut-to-nine-minute-dose/8505924	8/5/17, 02/10/17	ABC Aus	News	Mon	FS/R	PETER MAC PARTNERS TO PROVIDE INTRA-OPERATIVE RADIATION THERAPY VIA INTERNATIONAL TRIAL	https://www.petermac.org/news/peter-mac-partners-provide-intra-operative-radiation-therapy-international-trial	-	International	CT4	0	0	0	0	1	0	1	0	0	3	2	7		MF	Breast
Cause of rare acral and mucosal melanomas not linked to sun exposure, study finds	http://www.abc.net.au/news/2017-05-04/not-all-forms-of-melanoma-caused-by-sun-exposure-study-finds/8495896	4/5/17, 02/10/17	ABC Aus	News	Thu	PP	Whole-genome landscapes of major melanoma subtypes	https://www.nature.com/nature/journal/v545/n7653/full/nature22071.html	28467829	Aus	BR	3	0	0	1	1	0	1	1	0	1	2	10	MM	MM	Skin
Lung cancer risk prediction test developed using algorithm with almost 70pc success rate	http://www.abc.net.au/news/2017-05-04/lung-cancer-risk-prediction-test-developed-using-algorithm/8498202	4/5/17, 02/10/17	ABC Aus	News	Thu	PP	Identifying high risk individuals for targeted lung cancer screening: Independent validation of the PLCOm2012 risk prediction tool	http://onlinelibrary.wiley.com/doi/10.1002/ijc.30673/full	28249359	Aus	BR	3	1	0	0	1	0	1	0	1	3	3	13	FF	FM	Lung
Overweight and obese children at greater risk of getting asthma, cancer, study finds	http://www.abc.net.au/news/2017-04-13/overweight-and-obese-children-at-greater-risk-of-health-problems/8439716	13/4/17, 03/10/17	ABC Aus	News	Thu	Report	Impact of overweight and obesity as a risk factor for chronic conditions Australian Burden of Disease Study	https://www.aihw.gov.au/getmedia/f8618e51-c1c4-4dfb-85e0-54ea19500c91/20700.pdf.aspx?inline=true	-	Aus	Epid	0	0	0	0	1	0	1	0	1	2	3	8		F	general
Newcastle researchers a step closer to developing early test for ovarian cancer	http://www.abc.net.au/news/2017-08-08/newcastle-researchers-step-closer-to-early-ovarian-cancer-test/8786128	8/8/17, 03/10/17	ABC Aus	News	Tue	PP	In vivo genetic cell lineage tracing reveals that oviductal secretory cells self-renew and give rise to ciliated cells	http://dev.biologists.org/content/early/2017/07/21/dev.149989	28743800	Aus	BR	3	0	0	1	1	0	1	-	1	3	2	12	MM	M	ovarian
Melanoma therapy trials could prevent disease spreading, researchers say	http://www.abc.net.au/news/2017-09-11/new-melanoma-therapies-could-stop-cancer-spreading/8893216	11/9/17, 03/10/17	ABC Aus	News	Mon	PP	Adjuvant Dabrafenib plus Trametinib in Stage III BRAF-Mutated Melanoma	http://www.nejm.org/doi/full/10.1056/NEJMoa1708539#t=article	28891408	Aus	CT3	3	0	0	1	1	0	1	0	1	1	2	10	FM	M	Skin
Children exposed to CT scans face increased risk of developing cancer	http://www.abc.net.au/news/2017-04-04/ct-scan-exposure-increase-risk-of-cancer-for-kids-research-shows/8413478	4/4/17, 03/10/17	ABC Aus	News	Tue	C	-		-	Aus	Epid	0	0	1	0	0	0	1	1	-	-	-	3		MMM	general
New cancer treatment targeting immune-system-resistant tumours 'promising'	http://www.abc.net.au/news/2017-09-28/new-cancer-drugs-showing-promise/8994484	28/9/17, 03/10/17	ABC Aus	News	Thu	PP	De novo induction of intratumoral lymphoid structures and vessel normalization enhances immunotherapy in resistant tumors	http://www.nature.com/ni/journal/vaop/ncurrent/full/ni.3836.html?WT.feed_name=subjects_immunology	28892469	Aus	BR	3	0	0	0	1	0	1	0	0	3	2	10	FF	F	Lung
Keyhole surgery best option for women needing hysterectomies, study finds	http://www.abc.net.au/news/2017-03-29/study-finds-keyhole-surgery-best-for-hysterectomies/8394582	29/3/17, 04/10/17	ABC Aus	News	Wed	PP	Effect of Total Laparoscopic Hysterectomy vs Total Abdominal Hysterectomy on Disease-Free Survival Among Women With Stage I Endometrial Cancer	http://jamanetwork.com/journals/jama/article-abstract/2613158?resultClick=1	28350928	Aus	CT3	3	0	0	0	1	0	1	0	1	2	2	10	FM	MF	Uterus
DNA repair discovery could lead to drugs to reverse ageing, fight cancer and help space travel	http://www.abc.net.au/news/2017-03-24/dna-discovery-could-lead-to-anti-ageing,-cancer-fighting-drugs/8380850	24/3/17, 04/10/17	ABC Aus	News	Fri	PP	A conserved NAD+ binding pocket that regulates protein-protein interactions during aging	http://science.sciencemag.org/content/355/6331/1312	28336669	USA, Aus	BR	3	0	0	0	1	0	1	0	0	1	2	8	FM	MM	general
HPV: Tasmania has lowest rate of vaccination for cancer-related virus, study reveals	http://www.abc.net.au/news/2017-03-30/tasmania-records-lowest-rate-of-vaccination-for-hpv/8398928	30/3/17, 04/10/17	ABC Aus	News	Thu	Report	Healthy Communities: HPV immunisation rates in 2014–15	https://www.myhealthycommunities.gov.au/Content/publications/downloads/AIHW_HC_Report_HPV_March_2017.pdf?t=1507070774494	-	Aus	Epid	0	0	1	0	1	1	1	0	1	2	3	10		MMF	cervical
Simple test could replace invasive biopsies for people with blood cancer	http://www.abc.net.au/news/2017-03-18/blood-test-replace-invasive-biopsies-people-with-blood-cancer/8364404	18/3/17, 04/10/17	ABC Aus	News	Sat	PP	Circulating tumour DNA reflects treatment response and clonal evolution in chronic lymphocytic leukaemia	https://www.nature.com/articles/ncomms14756	28303898	Aus	BR	3	0	0	0	1	0	1	0	1	1	2	9	MF	MF	blood
HPV vaccine roll out reaches almost 80 per cent of 15-year-old girls in Australia	http://www.abc.net.au/news/2017-03-30/almost-80pc-of-girls-now-immunised-against-hpv-in-australia/8400322	30/3/17, 04/10/17	ABC Aus	News	Thu	Report	Healthy Communities: HPV immunisation rates in 2014–15	https://www.myhealthycommunities.gov.au/Content/publications/downloads/AIHW_HC_Report_HPV_March_2017.pdf?t=1507070774494	-	Aus	Epid	0	0	0	0	1	0	1	0	1	3	3	9		M	cervical
Men in Mr Fluffy houses two and a half times more likely to get mesothelioma	http://www.smh.com.au/act-news/men-in-mr-fluffy-houses-two-and-a-half-times-more-likely-to-get-mesothelioma-20170621-gwvaee.html	21/6/17, 28/9/17	SMH	ACT News	Wed	Report	ACT Asbestos Health Study: Data Linkage Study on the Risk of Mesothelioma and Other Cancers in Residents of Affected Properties in the ACT	http://nceph.anu.edu.au/files/ACTAHS_DataLinkageStudy_15June2017.pdf	-	Aus	Epid	0	0	0	1	1	1	1	1	1	2	3	11		MMF	lung
Modern cigarette filters increase the risk of lung cancer, study finds	http://www.smh.com.au/national/health/modern-cigarette-filters-increase-the-risk-of-lung-cancer-study-finds-20170525-gwcpbv.html	25/5/17, 29/9/17	SMH	Health	Thu	PP	Cigarette Filter Ventilation and its Relationship to Increasing Rates of Lung Adenocarcinoma	https://academic.oup.com/jnci/article/109/12/djx075/3836090/Cigarette-Filter-Ventilation-and-its-Relationship	28525914	USA	SR	3	0	1	0	1	0	1	0	1	3	3	13	FM	MM	Lung
Cancer risk spikes with one type of breast implant - and bacteria are to blame	http://www.smh.com.au/national/health/cancer-risk-spikes-with-one-type-of-breast-implant--and-bacteria-are-to-blame-20170512-gw3bbe.html	12/5/17, 29/9/17	SMH	Health	Fri	PP	Breast Implant–Associated Anaplastic Large Cell Lymphoma in Australia and New Zealand: High-Surface-Area Textured Implants Are Associated with Increased Risk	http://journals.lww.com/plasreconsurg/Citation/2017/10000/Breast_Implant_Associated_Anaplastic_Large_Cell.1.aspx	28481803	Aus	Epid	3	0	0	1	1	0	1	1	0	2	2	11	FM	M	blood
Study finds rare forms of melanomas are not caused by sun exposure	http://www.smh.com.au/nsw/study-finds-rare-forms-of-melanomas-are-not-caused-by-sun-exposure-20170505-gvzgxa.html	5/5/17, 29/9/17	SMH	NSW News	Fri	PP	Whole-genome landscapes of major melanoma subtypes		28467829	Aus	BR	3	0	0	0	1	0	0	1	0	0	1	6	MM	M	skin
Breast cancer: Breathing technique reduces cardiovascular risk from radiotherapy	http://www.smh.com.au/national/health/breast-cancer-breathing-technique-reduces-cardiovascular-risk-from-radiotherapy-20170428-gvul1t.html	30/4/17, 29/9/17	SMH	Health	Sun	PP	Assessment of voluntary deep inspiration breath-hold with CINE imaging for breast radiotherapy	http://onlinelibrary.wiley.com/doi/10.1111/1754-9485.12616/full	28432730	Aus	CR	3	0	0	1	1	0	1	0	0	2	1	9	MF	M	breast
Half a bottle of wine a week enough to put breast cancer survivors at risk	http://www.smh.com.au/national/health/half-a-bottle-of-wine-a-week-enough-to-put-breast-cancer-survivors-at-risk-20170504-gvyils.html	4/5/17, 29/9/17	SMH	Health	Thu	C	Investigating the contribution of alcohol in breast cancer recurrence and the way in which alcohol recommendations are discussed between clinicians and oncology patients		-	Aus	SR	0	1	0	0	1	0	1	0	1	2	2	8		F	breast
Queensland study finds smoking linked to skin cancer	http://www.smh.com.au/queensland/queensland-study-finds-smoking-linked-to-skin-cancer-20170516-gw6gbg	17/5/17, 29/9/17	SMH	Queensland News	Wed	PP	Cigarette Smoking and the Risks of Basal Cell Carcinoma and Squamous Cell Carcinoma	http://www.sciencedirect.com/science/article/pii/S0022202X17314124	28414022	Aus	Epid	3	0	0	0	1	0	0	0	1	2	2	9	MM	M	skin
Breastfeeding linked to lower risk of cancer of the uterus	http://www.smh.com.au/national/health/breastfeeding-linked-to-lower-risk-of-cancer-of-the-uterus-20170530-gwgqc8.html	30/5/17, 29/9/17	SMH	Health	Tue	PP	Breastfeeding and Endometrial Cancer Risk: An Analysis From the Epidemiology of Endometrial Cancer Consortium	http://journals.lww.com/greenjournal/fulltext/2017/06000/Breastfeeding_and_Endometrial_Cancer_Risk__An.16.aspx	28486362	International	MA	3	0	0	0	1	0	1	0	1	3	3	12	FF	F	uterus
Two-thirds of all cancers caused by DNA replication errors, landmark study shows	http://www.smh.com.au/national/health/twothirds-of-all-cancers-caused-by-dna-replication-errors-landmark-study-shows-20170323-gv4prw.html	24/3/17, 29/9/17	SMH	Health	Fri	PP	Stem cell divisions, somatic mutations, cancer etiology, and cancer prevention	http://science.sciencemag.org/content/355/6331/1330.full	28336671	USA	Epid	3	0	1	1	1	1	1	0	1	2	2	13	MM	MMFF	general
Scientists make giant leap in age-old pursuit of longer, healthier life	http://www.smh.com.au/technology/sci-tech/scientists-make-giant-leap-in-ageold-pursuit-of-longer-healthier-life-20170321-gv35yu.html	24/3/17, 29/9/17	SMH	Science	Fri	PP	A conserved NAD+ binding pocket that regulates protein-protein interactions during aging	http://science.sciencemag.org/content/355/6331/1312.full	28336669	USA, Aus	BR	3	1	0	0	1	0	1	0	0	1	2	9	FM	MM	general
The bone marrow blood test that is saving lives	http://www.smh.com.au/technology/sci-tech/the-bone-marrow-blood-test-that-is-saving-lives-20170307-gusdge.html	8/3/17, 29/9/17	SMH	Science	Wed	PP	Use of ubiquitous, highly heterozygous copy number variants and digital droplet polymerase chain reaction to monitor chimerism after allogeneic haematopoietic stem cell transplantation	http://www.sciencedirect.com/science/article/pii/S0301472X17300140	28147232	Aus	CR	3	0	0	0	1	0	1	0	0	1	2	8	MM	M	blood
Princess Alexandra Hospital doctors help develop chemo-free cancer drug	http://www.smh.com.au/queensland/princess-alexandra-hospital-doctors-help-develop-chemofree-cancer-drug-20170307-guszwj.html	8/3/17, 29/9/17	SMH	Queensland News	Wed	U	-		-	Aus	CR	0	0	0	0	0	0	1	0	-	-	-	1		M	lung
Mammograms from age 40 would save more lives, study finds	http://www.smh.com.au/national/mammograms-from-age-40-would-save-more-lives-study-finds-20170821-gy0uqo.html	21/8/17, 30/9/17	SMH	National News	Mon	PP	Comparison of recommendations for screening mammography using CISNET models	http://onlinelibrary.wiley.com/doi/10.1002/cncr.30842/abstract	28832983	USA	BR	3	0	1	0	1	0	1	0	1	3	3	13	FM	F	breast
The big five cancer killers: Australia's greatest health burden revealed in Australian Institute of Health and Welfare report	http://www.smh.com.au/national/health/the-big-five-cancer-killers-australias-greatest-health-burden-revealed-in-australian-institute-of-health-and-welfare-report-20170613-gwq8ew.html	14/6/17, 30/9/17	SMH	Health	Wed	Report	Burden of cancer in Australia	https://www.aihw.gov.au/getmedia/a1aec7bd-ddb7-416f-9a7e-f2133cd5d4cb/20965.pdf.aspx?inline=true	-	Aus	Epid	0	0	0	0	1	0	0	1	1	2	3	8		F	general
Cancer breakthrough: Melbourne scientists halt growth of some tumours	http://www.smh.com.au/national/health/cancer-breakthrough-melbourne-scientists-halt-growth-of-some-tumours-20170411-gvj4n9.html	12/4/17, 30/9/17	SMH	Health	Wed	PP	Inhibition of Hematopoietic Cell Kinase Activity Suppresses Myeloid Cell-Mediated Colon Cancer Progression	https://www.ncbi.nlm.nih.gov/pubmed/28399411	28399411	Aus	BR	3	0	0	0	1	0	1	0	0	1	0	6	FM	MM	bowel
Sea squirts could be prostate cancer's ‘achilles heel’	http://www.smh.com.au/queensland/sea-squirts-rainforest-trees-could-be-achilles-heel-for-prostate-cancer-cells-20170815-gxwj89.html	16/8/17, 30/9/17	SMH	Queensland News	Wed	U	-		-	Aus	BR	0	0	0	0	0	0	1	0	0	-	-	1		F	prostate
Australian researchers find two ways to stop melanoma from spreading and killing patients	http://www.smh.com.au/national/australian-researchers-discover-two-ways-to-stop-melanoma-from-spreading-and-killing-patients-20170905-gybboo.html	11/7/17, 30/9/17	SMH	Health	Mon	PP	Overall Survival with Combined Nivolumab and Ipilimumab in Advanced Melanoma	http://www.nejm.org/doi/pdf/10.1056/NEJMoa1709684	28889792	International	CT3	3	1	1	0	1	0	1	0	0	1	2	10	MM	MF	skin
Reduce alcohol by a litre a year, see a 15 per cent reduction in liver cancer	http://www.smh.com.au/national/health/reduce-alcohol-by-a-litre-a-year-see-a-15-per-cent-reduction-in-liver-cancer-20170924-gynlh4.html	25/9/17, 30/9/17	SMH	Health	Mon	Report	Alcohol consumption and liver, pancreatic, head and neck cancers in Australia: Time-series analyses	http://fare.org.au/wp-content/uploads/Jiang-et-al-Alcohol-and-cancer-25-September-2017.pdf	-	Aus	Epid	0	0	0	0	1	0	1	0	0	1	2	5		MM	liver
HPV test beats pap smears for detecting cervical cancer, trial shows	http://www.smh.com.au/national/health/hpv-test-beats-pap-smears-for-detecting-cervical-cancer-trial-shows-20170919-gyk6o3.html	20/9/17, 30/9/17	SMH	Health	Wed	PP	Cervical screening with primary HPV testing or cytology in a population of women in which those aged 33 years or younger had previously been offered HPV vaccination: Results of the Compass pilot randomised trial	https://www.ncbi.nlm.nih.gov/pmc/articles/PMC5604935/	28926579	Aus	CT1	3	0	0	0	1	0	1	0	1	2	3	11	FF	F	cervical
New, improved Gardasil 9 fights 90% of cervical cancers, beats genital warts too	http://www.smh.com.au/national/health/new-improved-gardasil-9-fights-90-of-cervical-cancers-beats-genital-warts-too-20170906-gyc5t6.html	6/9/17, 30/9/17	SMH	Health	Wed	PP	Final efficacy, immunogenicity, and safety analyses of a nine-valent human papillomavirus vaccine in women aged 16–26 years: a randomised, double-blind trial	http://www.thelancet.com/journals/lancet/article/PIIS0140-6736(17)31821-4/fulltext	28886907	International	CT3	3	1	0	0	1	0	1	1	1	2	2	12	MM	F	cervical
Tall men at bigger risk of aggressive prostate cancer, study suggests	https://www.theguardian.com/society/2017/jul/13/tall-men-at-bigger-risk-of-aggressive-prostate-cancer-study-suggests	13/7/17, 28/8/17	The Guardian UK	Society	Thu	PP	Tall height and obesity are associated with an increased risk of aggressive prostate cancer: results from the EPIC cohort study		28701188	UK	Epid	3	0	1	0	1	1	1	0	1	3	3	14	FF	FFM	prostate
Women with BRCA gene mutations given clearer picture of breast and ovarian cancer risk	https://www.theguardian.com/society/2017/jun/21/women-with-brca-gene-mutations-given-clearer-picture-of-breast-and-ovarian-cancer-risk	21/6/17, 28/8/17	The Guardian UK	Society	Wed	PP	Risks of Breast, Ovarian, and Contralateral Breast Cancer for BRCA1and BRCA2 Mutation Carriers	http://jamanetwork.com.wwwproxy1.library.unsw.edu.au/journals/jama/fullarticle/2632503	28632866	Aus	Epid	3	0	0	0	1	0	0	0	1	3	3	11	FM	F	breast
Prostate cancer blood test could transform treatment, say scientists	https://www.theguardian.com/society/2017/jun/19/prostate-cancer-blood-test-transform-treatment-scientists	19/6/17, 28/8/17	The Guardian UK	Society	Mon	PP	Circulating Free DNA to Guide Prostate Cancer Treatment with PARP Inhibition		28450425	UK	BR	3	1	0	0	1	0	0	0	1	3	3	12	FM	MM	prostate
Suntans for all: chemical causes any skin to tan – and protects against cancer	https://www.theguardian.com/society/2017/jun/13/scientists-create-fake-tan-which-could-protect-against-skin-cancer	13/6/17, 28/8/17	The Guardian UK	Society	Tue	PP	A UV-Independent Topical Small-Molecule Approach for Melanin Production in Human Skin		28614705	USA	BR	3	0	1	1	1	1	1	0	0	1	2	11	FM	MMM	skin
Testicular cancer: men most at risk could be identified using new gene group	https://www.theguardian.com/science/2017/jun/12/testicular-cancer-men-most-at-risk-could-be-identified-using-new-gene-group	12/6/17, 28/8/17	The Guardian UK	Science	Mon	PP	Identification of 19 new risk loci and potential regulatory mechanisms influencing susceptibility to testicular germ cell tumo		28604728	UK	BR	3	1	0	1	1	0	1	0	1	3	3	14	MF	FM	testicular
New therapy offers hope against incurable form of breast cancer	https://www.theguardian.com/science/2017/jun/05/breast-cancer-gene-therapy-olaparib-brca	6/6/17, 28/8/17	The Guardian UK	Science	Tue	C	OlympiAD: Phase III trial of olaparib monotherapy versus chemotherapy for patients (pts) with HER2-negative metastatic breast cancer (mBC) and a germline BRCA mutation (gBRCAm)	http://ascopubs.org/doi/abs/10.1200/JCO.2017.35.18_suppl.LBA4	-	USA	CT3	0	0	1	1	1	1	1	0	0	2	3	10		MM	breast
Drinking coffee may help prevent liver cancer, study suggests	https://www.theguardian.com/science/2017/may/25/drinking-coffee-may-help-prevent-liver-cancer-study-suggests	25/5/17, 2/9/17	The Guardian UK	Science	Thu	PP	Coffee, including caffeinated and decaffeinated coffee, and the risk of hepatocellular carcinoma: a systematic review and dose–response meta-analysis	http://bmjopen.bmj.com/content/7/5/e013739	28490552	UK	SR & MA	3	0	0	1	1	0	1	0	1	2	3	12	MF	MM	liver
Why your waist measurement can predict cancer risk	https://www.theguardian.com/society/2017/may/24/why-your-waist-measurement-can-predict-cancer-risk	24/5/17, 2/9/17	The Guardian UK	Society	Wed	PP	Comparison of general obesity and measures of body fat distribution in older adults in relation to cancer risk: meta-analysis of individual participant data of seven prospective cohorts in Europe	http://www.nature.com.wwwproxy1.library.unsw.edu.au/bjc/journal/v116/n11/full/bjc2017106a.html?foxtrotcallback=true	28441380	International	MA	3	0	0	1	1	0	0	0	1	2	3	11	MM	M	general
High blood platelet count 'as good a cancer predictor as a lump in the breast'	https://www.theguardian.com/science/2017/may/23/high-blood-platelet-count-as-good-a-cancer-predictor-as-a-lump-in-the-breast	23/5/17, 2/9/17	The Guardian UK	Science	Tue	PP	Clinical relevance of thrombocytosis in primary care: a prospective cohort study of cancer incidence using English electronic medical records and cancer registry data	http://bjgp.org.wwwproxy1.library.unsw.edu.au/content/67/659/e405	28533199	UK	CR	3	0	1	1	1	1	1	0	0	2	2	12	FM	FFM	breast
Century-old tumours could shed light on rare childhood cancers	https://www.theguardian.com/science/2017/may/18/100-century-old-tumours-could-shed-light-rare-childhood-cancers	18/5/17, 2/9/17	The Guardian UK	Science	Thu	PP	Molecular diagnoses of century-old childhood tumours	http://www.thelancet.com/journals/lanonc/article/PIIS1470-2045(17)30226-7/fulltext	28495283	UK	BR	3	0	1	1	1	0	1	-	1	3	3	14	MM	FMM	general
Cancer patients' grey hair unexpectedly darkens in drug study	https://www.theguardian.com/science/2017/jul/21/cancer-patients-grey-hair-unexpectedly-darkens-in-drug-study	21/7/17, 24/9/17	The Guardian UK	Science	Fri	PP	Hair Repigmentation During Immunotherapy Treatment With an Anti–Programmed Cell Death 1 and Anti–Programmed Cell Death Ligand 1 Agent for Lung Cancer, http://jamanetwork	http://jamanetwork.com.wwwproxy1.library.unsw.edu.au/journals/jamadermatology/fullarticle/2642914	28700789	Spain	CR	3	0	0	0	1	1	1	-	1	2	3	12	FM	MF	lung
Cancer-surviving women a third less likely to become pregnant, study finds	https://www.theguardian.com/science/2017/jul/03/cancer-surviving-women-third-less-likely-become-pregnant-study-finds	3/7/17, 25/9/17	The Guardian UK	Science	Mon	C	Pregnancy after cancer in girls and women in Scotland : a population-based analysis, http://www	http://www.idir.st-andrews.ac.uk/pregnancy-cancer-girls-women-scotland-populationbased-analysis/	-	UK	Epid	0	0	1	0	1	0	1	-	1	-	-	4		MMF	general
UK cancer survival rates lag behind those of other European countries – study	https://www.theguardian.com/society/2017/jul/18/uk-cancer-survival-rates-lag-behind-those-of-other-european-countries-study	18/7/17, 25/9/17	The Guardian UK	Society	Tue	PR	Comparator report on patient access to cancer medicines in Europe revisited – a UK perspective		-	Sweden	Epid	0	1	1	1	1	1	1	0	0	2	3	11		MMFF	general
Recorded childhood cancers rise by 13% worldwide, study finds	https://www.theguardian.com/society/2017/apr/11/recorded-childhood-cancers-rise-worldwide-world-health-organization	11/3/17, 25/9/17	The Guardian UK	Society	Tue	PP	International incidence of childhood cancer, 2001–10: a population-based registry study, http://www	http://www.thelancet.com/journals/lanonc/article/PIIS1470-2045(17)30186-9/fulltext?elsca1=tlpr	28410997	International	Epid	3	1	1	1	1	1	1	1	1	1	3	15	FM	MF	general
Antibiotics overuse could increase bowel cancer risk, study finds	https://www.theguardian.com/society/2017/apr/05/antibiotics-overuse-could-increase-bowel-cancer-risk-study-finds#img-1	5/3/17, 25/9/17	The Guardian UK	Society	Wed	PP	Long-term use of antibiotics and risk of colorectal adenoma, http://gut	http://gut.bmj.com/content/early/2017/03/16/gutjnl-2016-313413	28377387	USA	Epid	3	0	1	0	1	1	1	0	1	3	2	13	MF	M	bowel
Cancer symptoms often missed by GPs in England, study suggests	https://www.theguardian.com/society/2017/apr/25/cancer-symptoms-often-missed-by-gps-in-england-study-suggests-diagnosed-aande	25/4/17, 28/9/17	The Guardian UK	Society	Tue	PP	Emergency diagnosis of cancer and previous general practice consultations: insights from linked patient survey data	http://bjgp.org/content/early/2017/04/24/bjgp17X690869	28438775	UK	Epid	3	0	1	0	1	0	0	0	1	1	3	10	MM	MFF	general
Prostate cancer trial stuns researchers: 'It's a once in a career feeling'	https://www.theguardian.com/society/2017/jun/03/prostate-cancer-therapy-study-abiraterone	3/6/17, 28/9/17	The Guardian UK	Society	Sat	C	Adding abiraterone for men with high-risk prostate cancer (PCa) starting long-term androgen deprivation therapy (ADT): Survival results from STAMPEDE (NCT00268476)	http://meetinglibrary.asco.org/record/144558/abstract	-	UK, Switzerland	CT3	0	0	1	0	1	0	0	0	0	1	2	5		MM	prostate
Children who survive cancer face fewer serious long-term health issues – study	https://www.theguardian.com/science/2017/jun/02/childhood-cancer-survivors-fewer-long-term-side-effects	2/6/17, 28/9/17	The Guardian UK	Science	Fri	C	Temporal trends in chronic disease among survivors of childhood cancer diagnosed across three decades: A report from the Childhood Cancer Survivor Study (CCSS)	http://meetinglibrary.asco.org/record/144585/abstract	-	USA	Epid	0	0	1	0	1	0	1	0	1	2	3	9		MM	general
Study looks at cannabis ingredient's ability to help children's tumours	https://www.theguardian.com/society/2017/may/02/study-cannabis-cannabidiol-cbd-ability-to-help-children-brain-tumours	2/5/17, 28/9/17	The Guardian UK	Science	Tue	PR	New research to test effect of cannabidiol on child brain tumours	https://www.nottingham.ac.uk/news/pressreleases/2017/may/new-research-to-test-effect-of-cannabidiol-on-child-brain-tumours.aspx	-	UK	BR	0	1	1	0	1	0	1	-	1	3	2	10		MMF	brain
Experimental ovarian cancer treatment looks 'very promising', researchers say	https://www.theguardian.com/society/2017/jun/02/ovarian-cancer-new-treatment-shrink-tumors	3/6/17, 28/9/17	The Guardian UK	Society	Sat	C	An investigator-initiated phase I study of ONX-0801, a first-in-class alpha folate receptor targeted, small molecule thymidylate synthase inhibitor in solid tumors		-	UK	CT1	0	1	1	0	1	1	1	1	1	2	3	12		MM	ovarian
Overweight at 17? Your Colon Cancer Risk Rises	https://www.nytimes.com/2017/07/27/well/live/overweight-at-17-your-colon-cancer-risk-rises.html	27/7/17, 5/9/17	The NYT	Health	Thu	PP	Adolescent body mass index and risk of colon and rectal cancer in a cohort of 1		28736986	Israel	Epid	3	0	0	1	1	0	1	0	1	3	3	13	MM	M	Bowel
With Obamacare, More Breast Cancers Diagnosed at Earlier Stages	https://www.nytimes.com/2017/06/27/well/live/with-obamacare-more-breast-cancers-diagnosed-at-earlier-stages.html	27/6/17, 5/9/17	The NYT	Health	Tue	PP	Potential impact of the Affordable Care Act's preventive services provision on breast cancer stage: A preliminary assessment		28601783	USA	Epid	3	0	0	0	1	0	0	0	1	3	3	11	FF	F	Breast
Cancer Drug Proves to Be Effective Against Multiple Tumors	https://www.nytimes.com/2017/06/08/health/cancer-drug-keytruda-tumors.html	8/6/17, 5/9/17	The NYT	Health	Thu	PP	Mismatch repair deficiency predicts response of solid tumors to PD-1 blockade	http://science.sciencemag.org/content/357/6349/409	28596308	USA	CT2	3	1	0	1	1	1	1	1	1	2	3	15	FM	MM	general
With Melanoma, Lymph Node Removal May Not Improve Survival	https://www.nytimes.com/2017/06/07/well/live/with-melanoma-lymph-node-removal-may-not-improve-survival.html	7/6/17, 16/9/17	The NYT	Health	Wed	PP	Completion Dissection or Observation for Sentinel-Node Metastasis in Melanoma		28591523	International	CT3	3	0	0	1	1	0	0	0	1	3	3	12	MM	M	skin
More Women With Breast Cancer Opt to Remove Healthy Breast	https://www.nytimes.com/2017/03/29/well/live/more-women-with-breast-cancer-opt-to-remove-healthy-breast.html	29/3/17, 28/9/17	The NYT	Health	Wed	PP	State Variation in the Receipt of a Contralateral Prophylactic Mastectomy Among Women Who Received a Diagnosis of Invasive Unilateral Early-Stage Breast Cancer in the United States, 2004-2012	http://jamanetwork.com/journals/jamasurgery/article-abstract/2613702	28355431	USA	Epid	3	0	1	1	1	0	1	1	1	3	3	15	FM	FFM	breast
Gum Disease Tied to Cancer Risk in Older Women	https://www.nytimes.com/2017/08/02/well/gum-disease-tied-to-cancer-risk-in-older-women.html	2/8/17, 28/9/17	The NYT	Health	Wed	PP	Periodontal Disease and Incident Cancer Risk among Postmenopausal Women: Results from the Women's Health Initiative Observational Cohort	http://cebp.aacrjournals.org/content/26/8/1255.long	28765338	USA	Epid	3	0	0	1	1	0	1	0	1	3	3	13	FF	F	general
More Young People Are Dying of Colon Cancer	https://www.nytimes.com/2017/08/22/well/live/more-young-people-are-dying-of-colon-cancer.html	22/8/17, 30/9/17	The NYT	Health	Tue	PP	Colorectal Cancer Mortality Rates in Adults Aged 20 to 54 Years in the United States, 1970-2014	http://jamanetwork.com/journals/jama/article-abstract/2647859	28787497	USA	Epid	3	1	1	1	1	0	1	1	1	3	2	15	FM	MMMF	Bowel
Smart kids live longer	https://www.nytimes.com/2017/06/28/well/live/smart-kids-live-longer.html	28/6/17, 30/9/17	The NYT	Health	Wed	PP	Childhood intelligence in relation to major causes of death in 68 year follow-up: prospective population study	http://www.bmj.com/content/357/bmj.j2708	28659274	UK	Epid	3	0	0	1	1	0	0	0	1	3	3	12	FM	M	gastric
Red Meat Increases Risk of Dying From 8 Diseases	https://www.nytimes.com/2017/05/15/well/eat/red-meat-increases-risk-of-dying-from-8-diseases.html?mtrref=query.nytimes.com	15/5/17, 30/9/17	The NYT	Health	Thu	PP	Mortality from different causes associated with meat, heme iron, nitrates, and nitrites in the NIH-AARP Diet and Health Study: population based cohort study	http://www.bmj.com/content/357/bmj.j1957	28487287	USA	Epid	3	0	0	0	1	1	0	0	0	2	1	8	MM	M	general
What We Learn When Two Ruthless Killers, Heart Disease and Cancer, Reveal a Common Root	https://www.nytimes.com/2017/09/27/magazine/can-heart-disease-shed-light-on-cancer.html?mtrref=query.nytimes.com	27/9/17, 30/9/17	The NYT	Magazine	Wed	PP	Effect of interleukin-1β inhibition with canakinumab on incident lung cancer in patients with atherosclerosis: exploratory results from a randomised, double-blind, placebo-controlled trial	http://www.thelancet.com/journals/lancet/article/PIIS0140-6736(17)32247-X/fulltext	28855077	USA	CT3	3	0	1	0	1	1	1	0	1	3	3	14	MM	MF	general
What Does It Cost to Create a Cancer Drug? Less Than You’d Think	https://www.nytimes.com/2017/09/11/health/cancer-drug-costs.html	11/9/17, 02/10/17	The NYT	Health	Mon	PP	Research and Development Spending to Bring a Single Cancer Drug to Market and Revenues After Approval	http://jamanetwork.com/journals/jamainternalmedicine/article-abstract/2653012	28892524	USA	Economic analysis	3	0	1	1	1	1	1	1	1	3	3	16	MM	MMMF	general
Monsanto Weed Killer Roundup Faces New Doubts on Safety in Unsealed Documents	https://www.nytimes.com/2017/03/14/business/monsanto-roundup-safety-lawsuit.html	14/3/17, 02/10/17	The NYT	Business	Tue	Report	IARC Monographs Volume 112: evaluation of five organophosphate insecticides and herbicides	http://www.iarc.fr/en/media-centre/iarcnews/pdf/MonographVolume112.pdf	25801782	International	SR	3	0	0	1	1	0	1	0	1	3	3	13	FM	M	blood
The HPV Vaccine Gains Ground Among U.S. Teenagers	https://www.nytimes.com/2017/09/22/health/hpv-vaccine-teenagers.html	22/9/17, 02/10/17	The NYT	Health	Sun	Report	National, Regional, State, and Selected Local Area Vaccination Coverage Among Adolescents Aged 13–17 Years — United States, 2016	https://www.cdc.gov/mmwr/volumes/66/wr/mm6633a2.htm?s_cid=mm6633a2_w#contribAff	28837546	USA	Epid	0	1	0	1	1	0	1	0	1	3	2	10	FF	F	cervical
Traces of Controversial Herbicide Are Found in Ben & Jerry’s Ice Cream	https://www.nytimes.com/2017/07/25/dining/ben-and-jerrys-ice-cream-herbicide-glyphosate.html	25/7/17, 02/10/17	The NYT	Health	Tue	Report	Ben & Jerry’s Ice Cream Tests Positive for Roundup Herbicide Ingredient, Glyphosate		-	USA	BR	0	1	1	0	1	1	1	1	1	2	2	11		MM	blood
Drug Aimed at Inflammation May Lower Risk of Heart Disease and Cancer	https://www.nytimes.com/2017/08/27/science/ilaris-heart-disease-cancer-study.html?mtrref=undefined	27/8/17, 02/10/17	The NYT	Health	Sun	PP	Effect of interleukin-1β inhibition with canakinumab on incident lung cancer in patients with atherosclerosis: exploratory results from a randomised, double-blind, placebo-controlled trial	http://www.thelancet.com/journals/lancet/article/PIIS0140-6736(17)32247-X/fulltext?elsca1=tlxpr	28855077	USA	CT3	3	1	1	1	1	1	1	0	1	3	3	16	MM	MMMMMF	lung
Hormone Treatment for Prostate Cancer Tied to Heart Risks	https://www.nytimes.com/2017/08/31/well/live/hormone-treatment-for-prostate-cancer-tied-to-heart-risks.html	31/8/17, 02/10/17	The NYT	Health	Thu	PP	Cardiovascular disease risk and androgen deprivation therapy in patients with localised prostate cancer: a prospective cohort study	http://www.nature.com/bjc/journal/vaop/ncurrent/full/bjc2017280a.html?foxtrotcallback=true	-	USA	Epid	3	0	0	1	1	0	0	0	1	3	3	12		F	prostate
F.D.A. Panel Recommends Approval for Gene-Altering Leukemia Treatment	https://www.nytimes.com/2017/07/12/health/fda-novartis-leukemia-gene-medicine.html	12/7/17, 02/10/17	The NYT	Health	Wed	FS/R	Determine Efficacy and Safety of CTL019 in Pediatric Patients With Relapsed and Refractory B-cell ALL (ELIANA)	https://clinicaltrials.gov/ct2/show/NCT02435849	-	USA	CT2	0	1	1	0	0	1	1	1	1	2	2	10		FMM	blood
FDA Approves Lilly Pill for Common Advanced Breast Cancer	https://www.nytimes.com/aponline/2017/09/28/health/ap-us-med-fda-breast-cancer-drug.html?mtrref=query.nytimes.com	28/9/17, 02/10/17	The NYT	Health	Thu	PP	MONARCH 2: Abemaciclib in Combination With Fulvestrant in Women With HR+/HER2− Advanced Breast Cancer Who Had Progressed While Receiving Endocrine Therapy	http://ascopubs.org/doi/full/10.1200/JCO.2017.73.7585	28580882	International	CT3	3	1	1	0	1	0	1	1	1	3	3	15	MM		breast
Fitness May Lower Breast Cancer Risk	https://www.nytimes.com/2017/09/06/well/move/fitness-exercise-breast-cancer-risk.html	6/9/17, 02/10/17	The NYT	Health	Wed	PP	Inherent aerobic capacity-dependent differences in breast carcinogenesis	https://academic.oup.com/carcin/article-abstract/doi/10.1093/carcin/bgx066/3988099/Inherent-aerobic-capacity-dependent-differences-in?redirectedFrom=fulltext	28911004	USA	BR	3	0	0	1	1	1	1	0	1	3	2	13	MM	M	breast
New Study Offers Support for Prostate Testing	https://www.nytimes.com/2017/09/04/well/live/new-study-offers-support-for-prostate-testing.html	4/9/17, 02/10/17	The NYT	Health	Mon	PP	Reconciling the Effects of Screening on Prostate Cancer Mortality in the ERSPC and PLCO Trials	http://annals.org/aim/article/2652567/reconciling-effects-screening-prostate-cancer-mortality-erspc-plco-trials	28869989	International	CR	3	0	1	1	1	1	1	0	1	3	3	15	MF	MMMF	prostate
